# Supplementary material
Source: publisher figshare collection journal article supplement (https://acs.figshare.com/ndownloader/files/3948688)
Supplement: Supplementary file 1 [file 3948688]

# The effect of surfactants on the self-assembly of a model elastin-like block co-recombinamer: From micelles to an aqueous two-phase system

*Guillermo Pinedo-Martín, Emilio Castro, Laura Martín, Matilde Alonso, J. Carlos Rodríguez-Cabello*

Bioforge Group, University of Valladolid, CIBER-BBN, Paseo de Belén 11, 47011 Valladolid, Spain

## Chemical structure of the surfactants.

- DTAB:

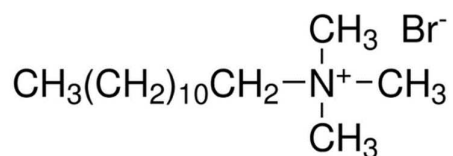

- OG:

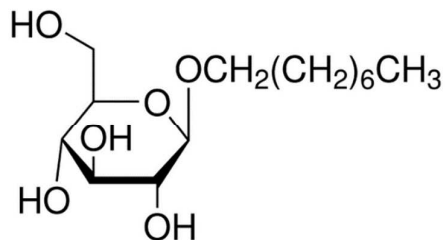

- SDS:

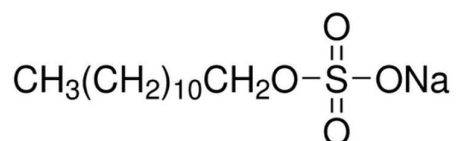

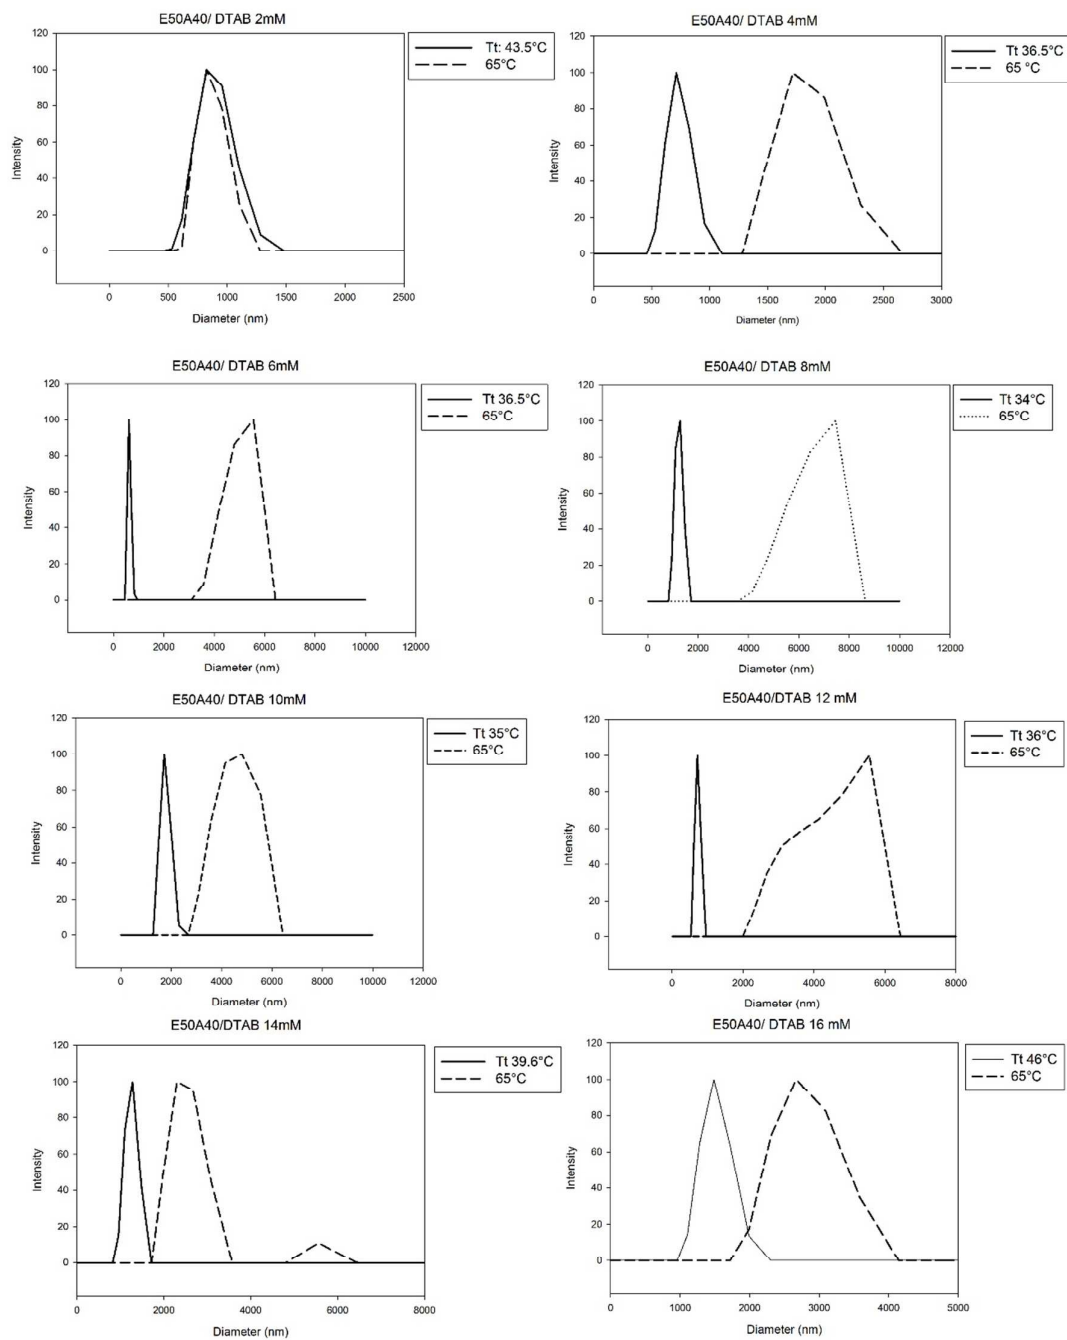

**Figure S1:** Size distribution of ELbcR/DTAB as measured by DLS after 90 min at their corresponding T<sub>t</sub> and at 65°C

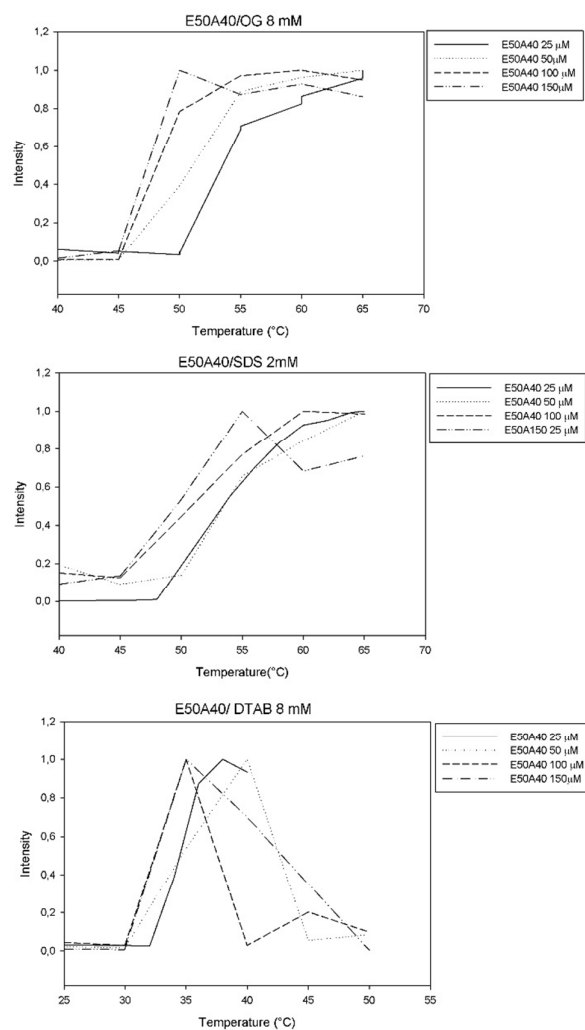

**Figure S2:** Normalized intensity profile of scattered light as a function of temperature for different concentrations of ELbcR at a fixed surfactant concentration.  $T_i$  is taken to be the temperature at which the change in the scattered intensity reaches a value of 50%.

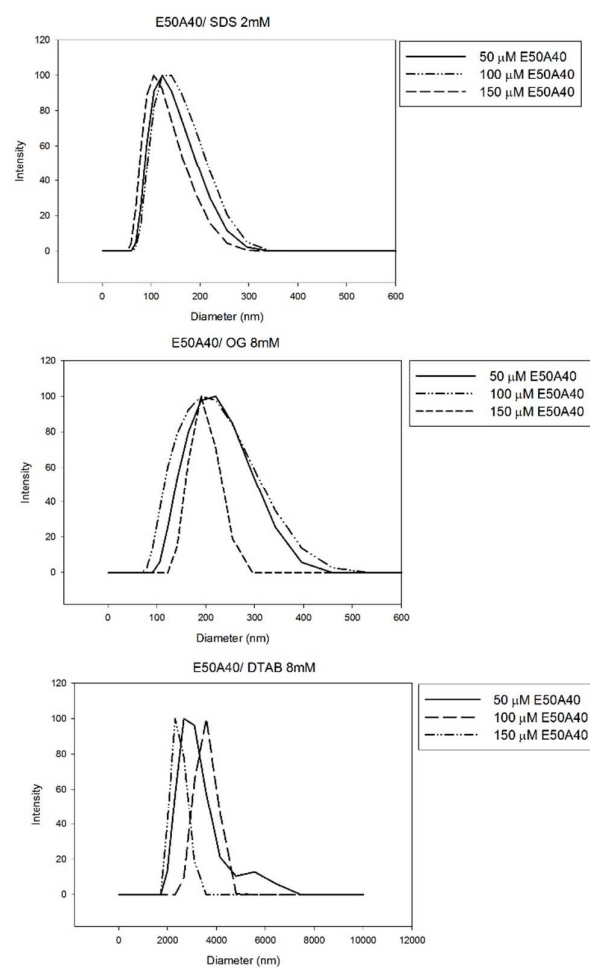

**Figure S3:** Size distribution as measured by DLS at 65°C for different concentrations of ELbcR with a fixed surfactant solution.
